# Supplementary material for: Enhanced electronic properties in CH3NH3PbI3via LiCl mixing for hole-conductor-free printable perovskite solar cells
Source: Royal Society of Chemistry journal article supplement (doi:10.1039/c6ta08021a), 2016-01-01
Supplement: c6ta08021a1.pdf [file c6ta08021a1.pdf]

## Supporting Information

### **Improved conductivity of $\text{CH}_3\text{NH}_3\text{PbI}_3$ via mixing LiCl for hole-conductor-free fully printable perovskite solar cells**

Yusong Sheng<sup>†</sup>, Yue Hu<sup>†</sup>, Anyi Mei, Pei Jiang, Xiaomeng Hou, Miao Duan, Li Hong, Yanjun Guan, Yaoguang Rong, Yuli Xiong, Hongwei Han\*

*Michael Grätzel Center for Mesoscopic Solar Cells, Wuhan National Laboratory for Optoelectronics, School of Optical and Electronic Information, Huazhong University of Science and Technology, Wuhan 430074, Hubei, P. R. China*

\* Correspondence to Hongwei Han, E-mail: hongwei.han@mail.hust.edu.cn

**Table S1.** Performance of the studied solar cells under AM 1.5G illumination

| Sample  |          | $V_{oc}$<br>(mV) | $J_{sc}$<br>(mA cm <sup>-2</sup> ) | FF         | PCE (%)    |
|---------|----------|------------------|------------------------------------|------------|------------|
| Control | average  | 874±10           | 17.15±0.81                         | 0.66±0.024 | 9.81±0.45  |
|         | champion | 884              | 17.11                              | 0.71       | 10.70      |
| 15%     | average  | 895±12           | 18.05±0.36                         | 0.72±0.017 | 11.56±0.38 |
|         | champion | 915              | 18.08                              | 0.74       | 12.24      |
| 30%     | average  | 935±14           | 18.98±0.60                         | 0.78±0.020 | 13.65±0.39 |
|         | champion | 927              | 20.20                              | 0.77       | 14.46      |
| 50%     | average  | 871±13           | 12.37±0.62                         | 0.80±0.013 | 8.62±0.53  |
|         | champion | 888              | 12.64                              | 0.82       | 9.15       |

**Table S2.** The XPS ultimate analysis of I, Cl and Pb. The mixing perovskite was prepared by spin-coating method on FTO and annealed at 100 °C for 10 min.

| Peak  | Position<br>BE (eV) | FWHM<br>(eV) | Raw Area<br>(cps eV) | Atomic<br>Mass | Atomic<br>Conc % | Mass<br>Conc % |
|-------|---------------------|--------------|----------------------|----------------|------------------|----------------|
| I 3d  | 618.896             | 1.159        | 714282.2             | 126.904        | 30.04            | 56.24          |
| Cl 2p | 198.846             | 0.909        | 1160.1               | 35.460         | 0.62             | 0.33           |
| Pb 4f | 137.946             | 0.920        | 183062.8             | 207.206        | 10.74            | 32.84          |

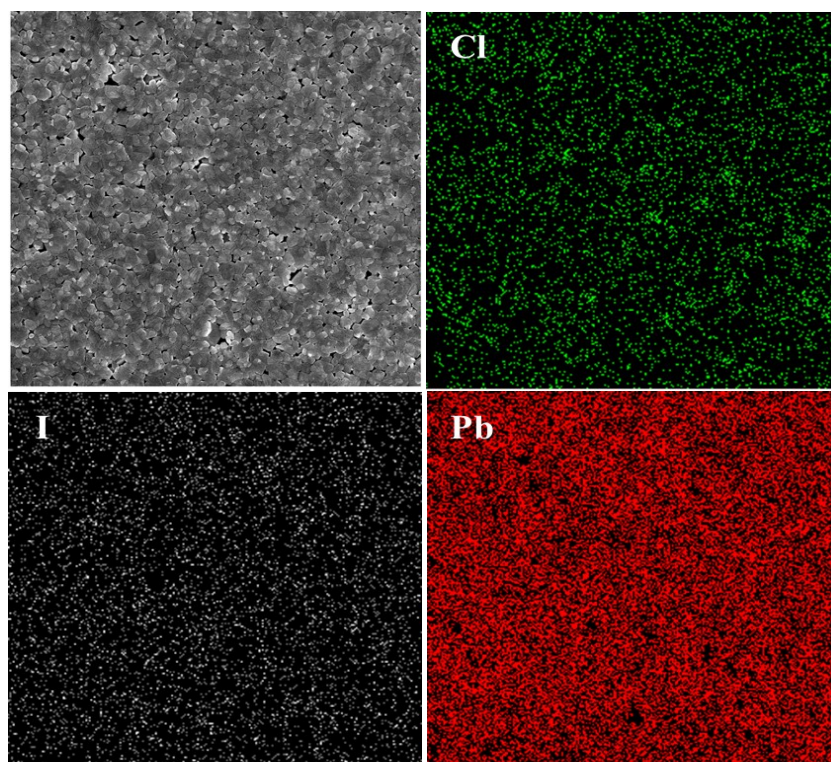

Fig. S1 The surface SEM image of 30% perovskite/LiCl film (on FTO) and its EDS elemental mapping of Cl, I and Pb.

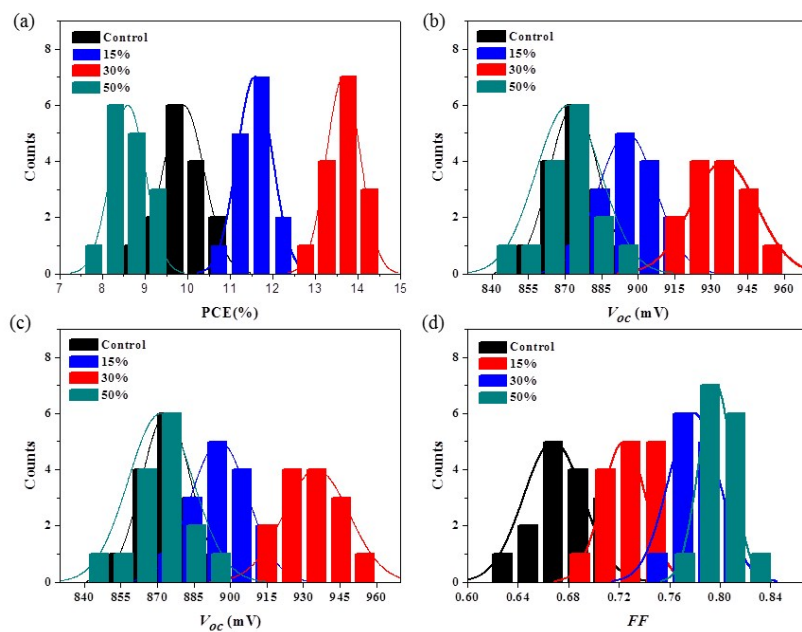

Fig. S2 Histograms of (a) PCE, (b)  $V_{oc}$ , (c)  $J_{sc}$ , and (d) FF of all the devices.

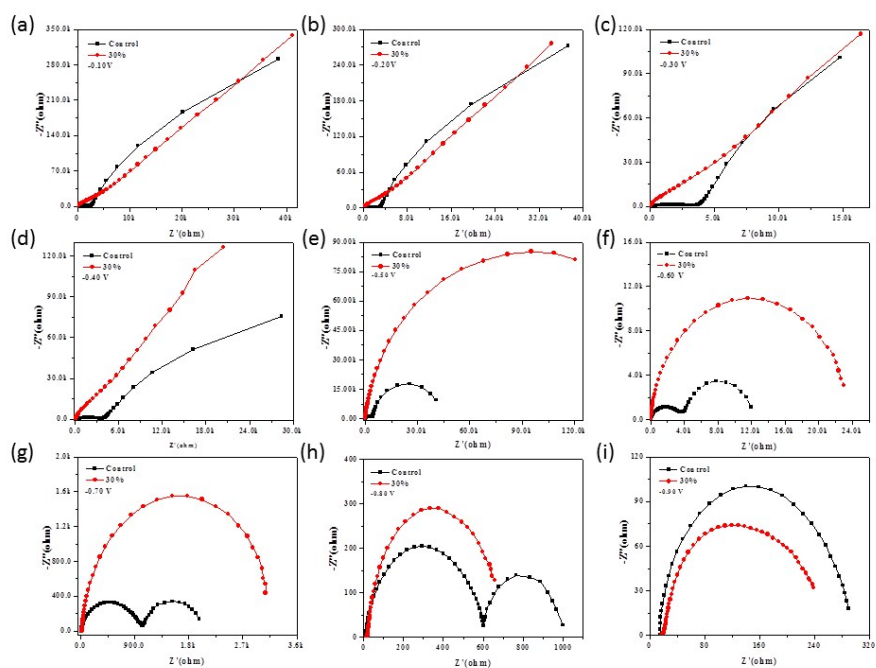

**Fig. S3** Nyquist plots of the control and 30% LiCl-based devices under dark at various bias.

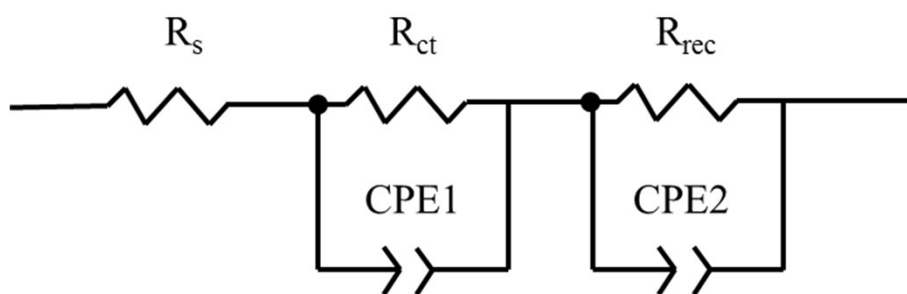

**Fig. S4** Equivalent circuit was used to fit the Nyquist curves.

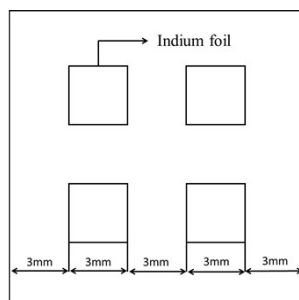

**Fig. S5** Sample schematic diagram for Hall-effect measurements.

### Hall-effect measurement

The sample used for Hall-effect measurement was prepared by spin coating process on the glass (15×15 mm). The thicknesses of perovskite about 1mm. Firstly, we prepared the perovskite layer on the glass. Then we pasted four indium foils (3×3 mm) on the surface of perovskite layer. Finally, the sample was used for Hall-effect measurement. Hall-effect measurements were performed at room temperature on a 4-probe sample holder placed between the plates of an electromagnet, where the magnetic field of 0.55 T and current of 40 nA were applied.

**Table S3.** The Hall-effect measurement parameters of the 30% LiCl-based film.

| NO. | I (nA)   | Bulk concentration ( $\text{cm}^{-3}$ ) | Resistivity (ohm cm) | Conductivity (1/ohm cm) | Mobility ( $\text{cm}^2/\text{Vs}$ ) | Average Hall coefficient ( $\text{cm}^3/\text{C}$ ) |
|-----|----------|-----------------------------------------|----------------------|-------------------------|--------------------------------------|-----------------------------------------------------|
| 1   | 5.00E-09 | -6.80E+14                               | 1.40E+02             | 7.16E-03                | 6.57E+01                             | -9.18E+03                                           |
| 2   | 1.00E-08 | -4.29E+15                               | 1.21E+02             | 8.28E-03                | 1.21E+01                             | -1.45E+03                                           |
| 3   | 1.50E-08 | -1.06E+15                               | 1.34E+02             | 7.44E-03                | 4.36E+01                             | -5.86E+03                                           |
| 4   | 2.00E-08 | -2.18E+15                               | 1.23E+02             | 8.12E-03                | 2.32E+01                             | -2.86E+03                                           |
| 5   | 2.50E-08 | 2.74E+17                                | 9.87E+01             | 1.01E-02                | 2.31E-01                             | 2.28E+01                                            |
| 6   | 3.00E-08 | -7.92E+15                               | 7.31E+01             | 1.37E-02                | 1.08E+01                             | -7.88E+02                                           |
| 7   | 4.00E-08 | -1.74E+15                               | 5.71E+01             | 1.75E-02                | 6.27E+01                             | -3.58E+03                                           |
| 8   | 5.00E-08 | -5.67E+15                               | 1.02E+02             | 9.81E-03                | 1.08E+01                             | -1.10E+03                                           |
